# Supplementary material for: Comparative Production of Bio-Oil from In Situ Catalytic Upgrading of Fast Pyrolysis of Lignocellulosic Biomass
Source: MDPI journal article supplement (doi:10.3390/en16062715), 2023-03-14
Supplement: s1 [file s1]

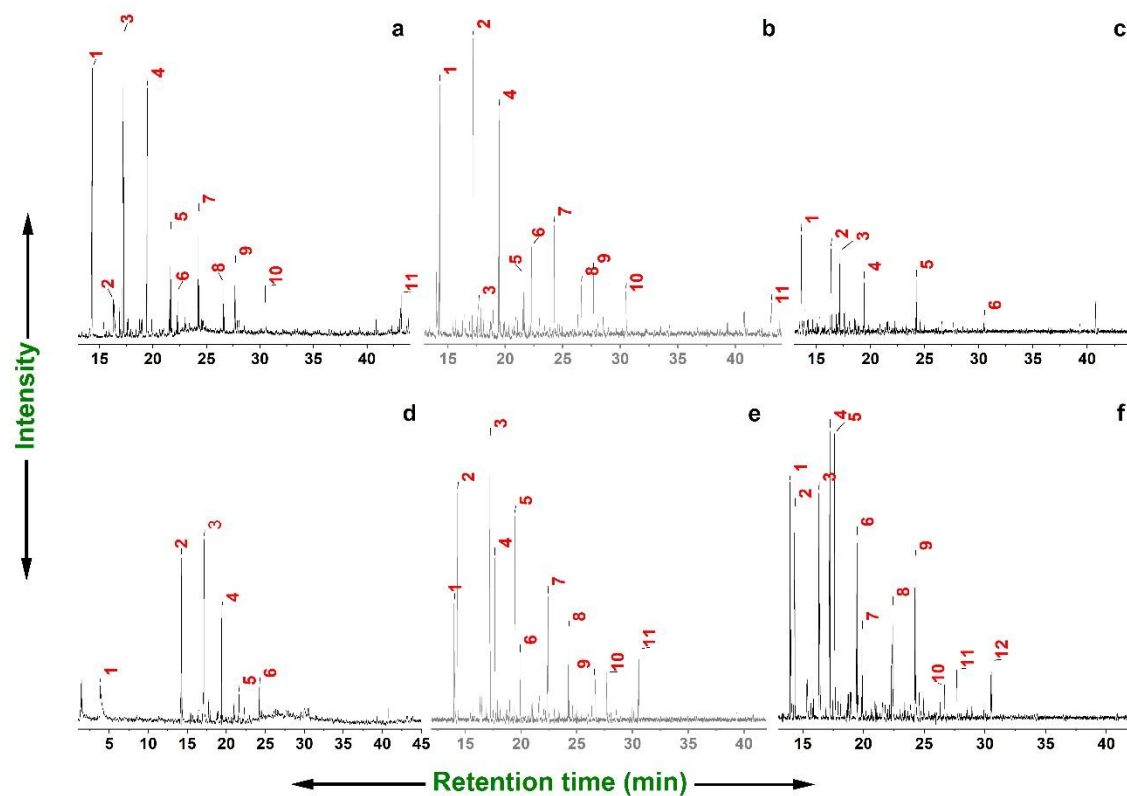

**Figure S1.** GC-MS chromatogram resulting from H-ZSM-5 upgraded bio-oil from Kraft Lignin-Toluene Soluble: (a) 673 K; (b) 773 K and; (c) 873 K--MeOH Soluble; (d) 673 K; (e) 773 K and; (f) 873 K.

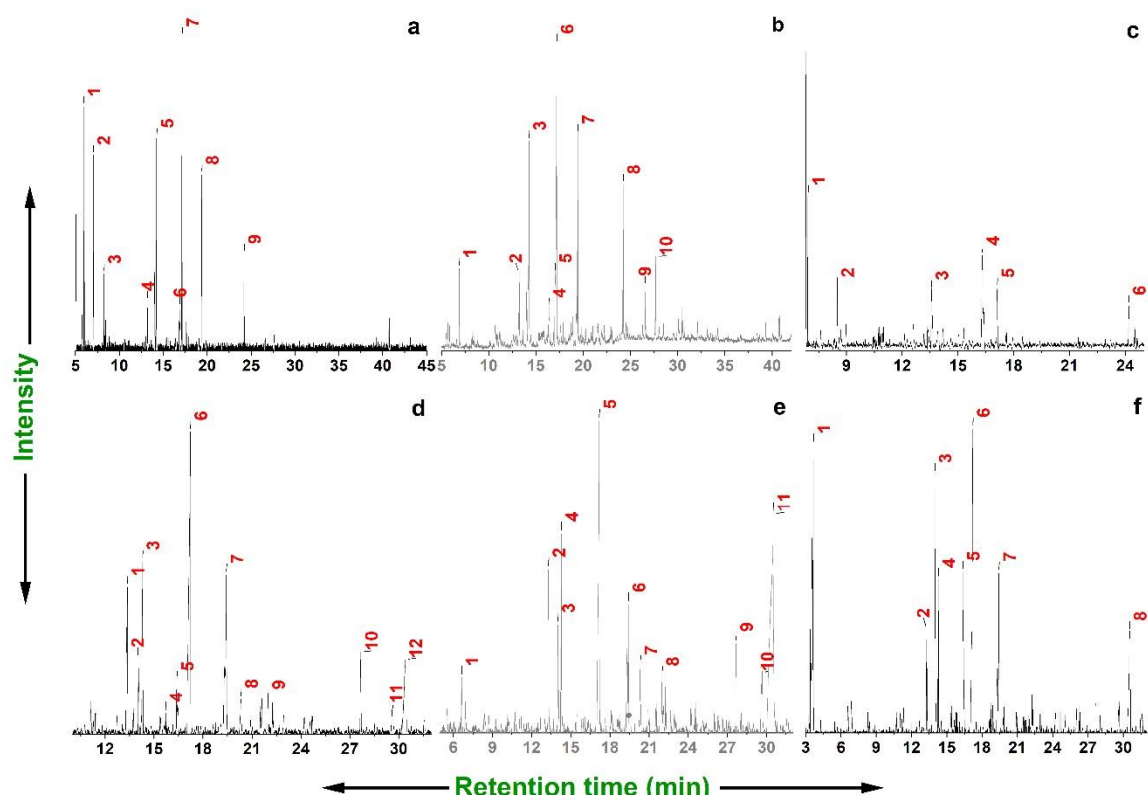

**Figure S2.** GC-MS chromatogram resulting from H-ZSM-5 upgraded bio-oil from Spruce (Softwood) Toluene Soluble: (a) 673 K; (b) 773 K and; (c) 873 K--MeOH Soluble; (d) 673 K; (e) 773 K and; (f) 873 K
